# Supplementary material
Source: Royal Society of Chemistry journal article supplement (doi:10.1039/d6cp00819d)
Supplement: d6cp00819d1.pdf [file d6cp00819d1.pdf]

## Supporting Information

# Photothermally Induced Shape Memory Effect in Thermoplastic Polyurethanes with Gold Nanoparticles

*Ainur F. Abukaev<sup>1</sup>, Lada O. Sineva<sup>1</sup>, Azaliia F. Akhkiamova<sup>1,2</sup>, Marina A. Gorbunova<sup>1</sup>, Polina M. Ivantcova<sup>3</sup>, Elena N. Subcheva<sup>3</sup>, Denis V. Anokhin<sup>\*1,2,3</sup>, Dimitri A. Ivanov<sup>\*1,2,3,4</sup>*

<sup>1</sup> Federal Research Centre of Problems of Chemical Physics and Medicinal Chemistry RAS, 142432 Chernogolovka, Russia

<sup>2</sup> Lomonosov Moscow State University (MSU), Leninskie Gory, 1, Moscow, 119991, Russia

<sup>3</sup> Scientific Center for Genetics and Life Sciences, Sirius University of Science and Technology, 1 Olympic Ave, 354340 Sochi, Russia

<sup>4</sup> Institut de Sciences des Matériaux de Mulhouse, CNRS UMR7361, 15 rue Jean Starcky, 68057 Mulhouse, France

**Table S1.** The content of AuNPs in the TPU-AuNP films

| Sample        | AuNP content in films, mass % | AuNP content in films, ppm |
|---------------|-------------------------------|----------------------------|
| TPU-0%AuNP    | 0                             | 0                          |
| TPU-0.25%AuNP | 0.25                          | 2500                       |
| TPU-0.47%AuNP | 0.47                          | 4700                       |
| TPU-1.3%AuNP  | 1.3                           | 13000                      |

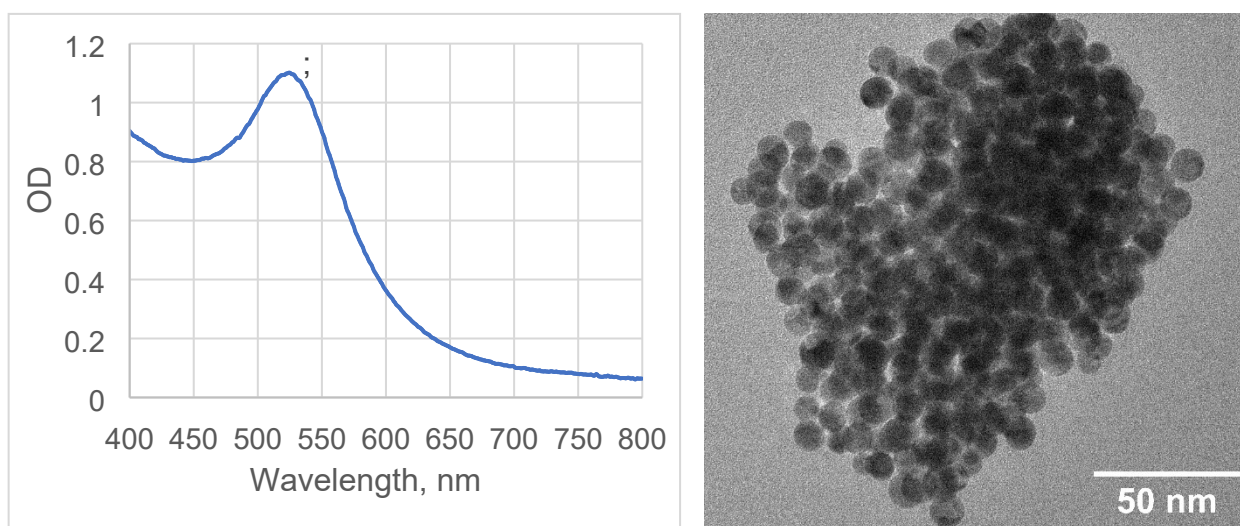

**Fig. S1.** UV-Vis absorption spectra (left) and TEM image (right) of the synthesized gold nanoparticles.

**Table S2.** Thermal properties of the synthesized nanocomposites.

| Sample        | $T_{m1}$ , ° | $\Delta H_1$ , J/g* | $T_{m2}$ , ° | $\Delta H_2$ , J/g | $t_{1/2}$ , min | $t_0$ , min |
|---------------|--------------|---------------------|--------------|--------------------|-----------------|-------------|
| TPU-0%AuNP    | 36.7         | 50.9                | 32.7         | 36.9               | 10.7            | 1.4         |
| TPU-0.25%AuNP | 35.4         | 50.2                | 32.7         | 31.9               | 5.6             | 1.5         |
| TPU-0.47%AuNP | 35.3         | 50.5                | 32.8         | 35.7               | 9               | 2.7         |
| TPU-1.3%AuNP  | 35.6         | 46.6                | 32.8         | 35.0               | 11              | 2.8         |

\*  $\Delta H_1$  and  $\Delta H_2$  represent melting enthalpy obtained from the first and second heating cycles, respectively;  $T_{m1}$  and  $T_{m2}$ , are corresponding melting points;  $t_{1/2}$  denotes the crystallization half-time;  $t_0$  represents the induction period.

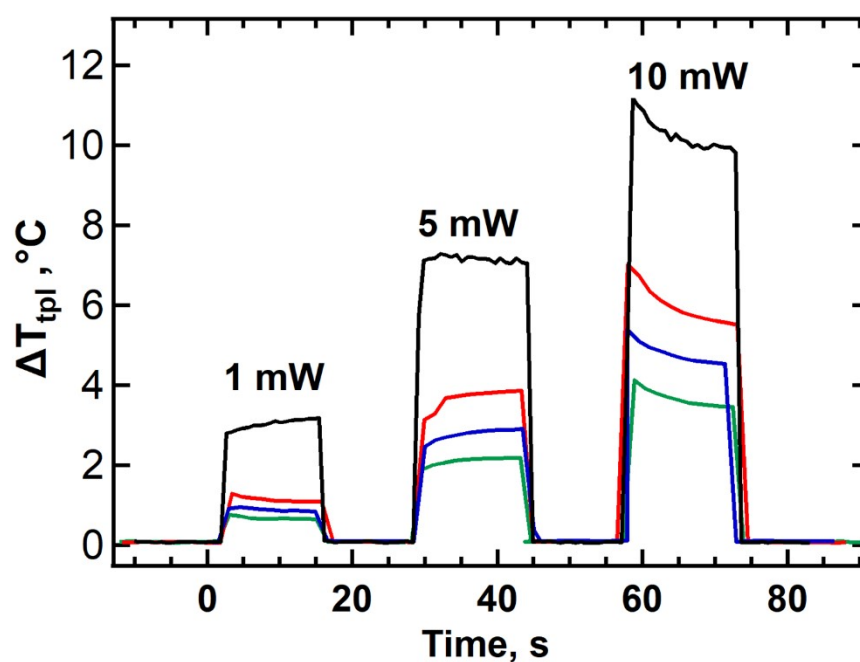

**Figure S2.** Temperature increase on the nanocalorimeter chip  $T_{tpi}$  as a function of laser power for TPU-0%AuNP (green), TPU-0.25%AuNP (blue), TPU-0.47%AuNP (red), and TPU-1.3%AuNP (black).

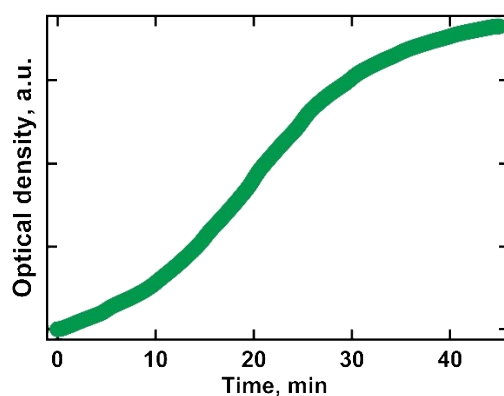

**Figure S3.** Crystallization kinetics of TPU-1.3%AuNP in region 2 extracted from a sequence of polarized optical microscopy images.

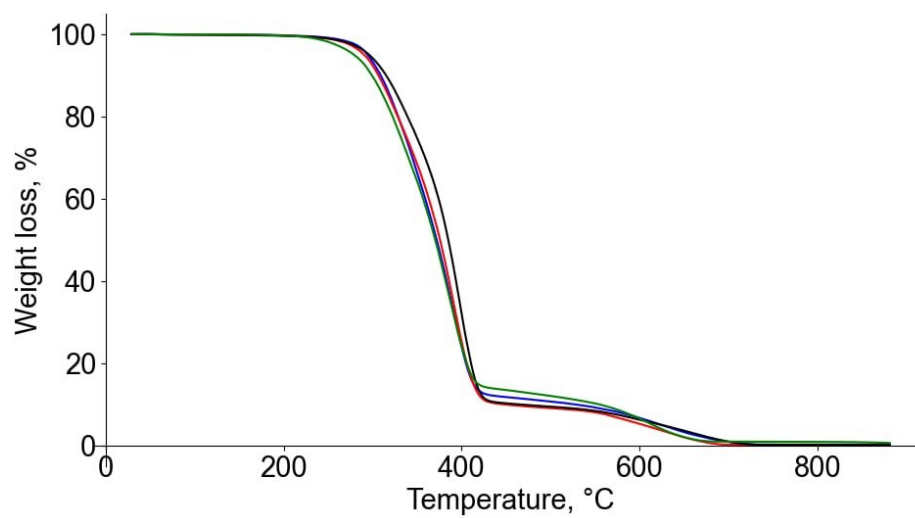

**Figure S4.** TGA curves (weight loss) of TPU-0%AuNP (green), TPU-0.25%AuNP (blue), TPU-0.47%AuNP (red), and TPU-1.3%AuNP (black).
